# Supplementary material for: Oxacillin promotes membrane vesicle secretion in Staphylococcus aureus via a SarA–Sle1 regulatory cascade
Source: Royal Society of Chemistry journal article supplement (doi:10.1039/d4nr04321a), 2024-11-19
Supplement: d4nr04321a1.pdf [file d4nr04321a1.pdf]

## Supplementary Materials

### Supplementary Figures and Figure Legends

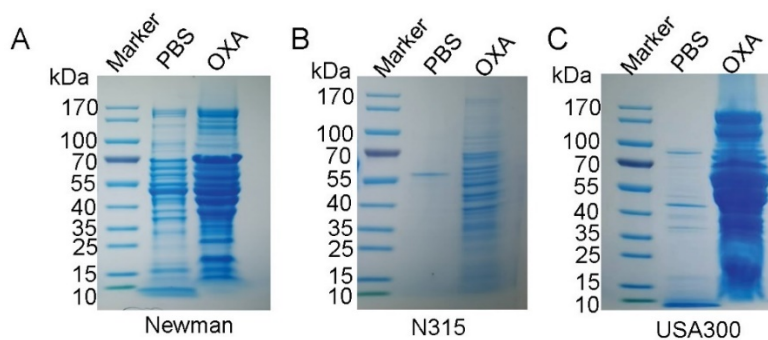

**Fig. S1** SDS-PAGE analysis of MVs derived from *S. aureus* Newman (A), N315 (B), and USA300 (C) after OXA treatment. PBS served as a negative control.

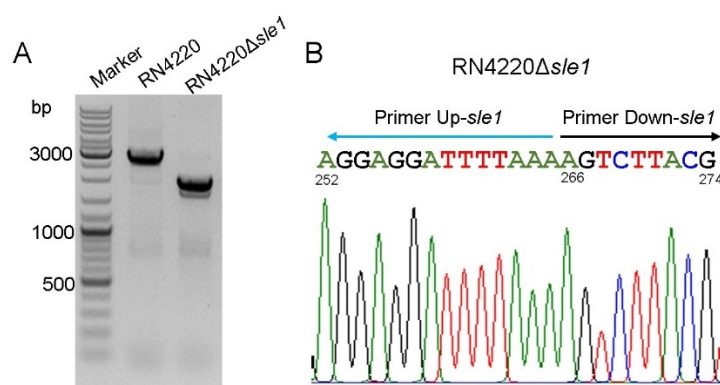

**Fig. S2** Characterization of *S. aureus* RN4220 $\Delta$ *sle1*. (A) PCR identification of the RN4220 $\Delta$ *sle1* strain. The primer pair *sle1*-out-L/R used is listed in Table S4. (B) DNA sequencing showing deletion of *sle1* gene in the RN4220 $\Delta$ *sle1* strain.

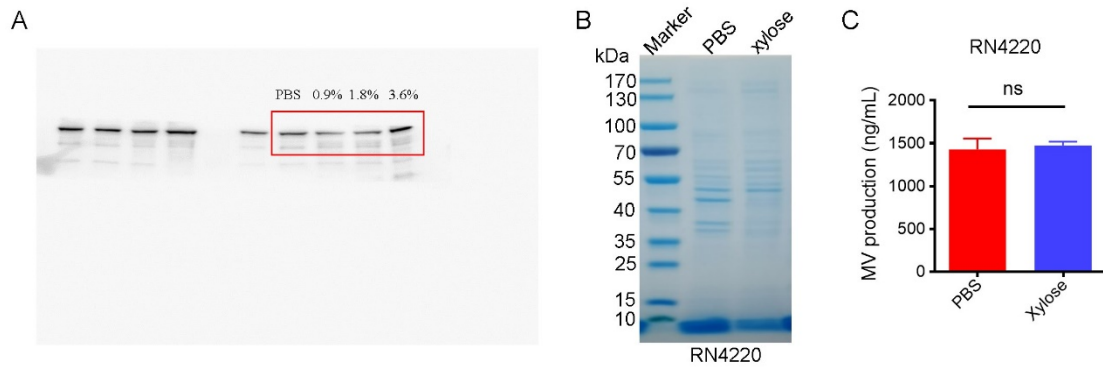

**Fig. S3** The effect of xylose on *S. aureus* MV production. (A) The full-length blot for the Western blot in Fig. 3D. The red box represents the depicted part of the blot. (B) SDS-PAGE analysis of the proteins in MVs derived from *S. aureus* RN4220 with or without xylose induction. (C) BCA detection of the total xylose-induced MV proteins prepared from *S. aureus* RN4220. PBS served as a negative control. The statistical difference was calculated by Student's *t*-test, and ns represents no significance.

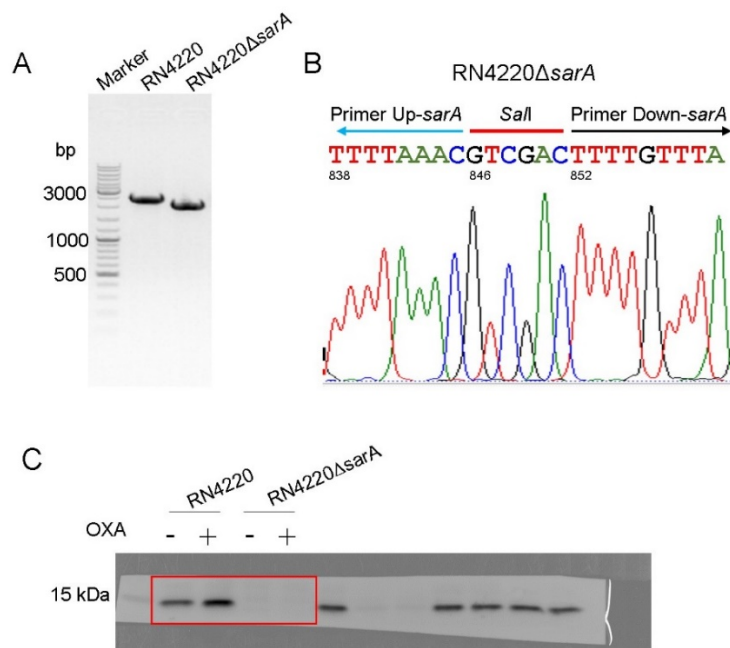

**Fig. S4** Characterization of *S. aureus* RN4220 $\Delta$ *sarA*. (A) PCR identification of the RN4220 $\Delta$ *sarA* strain. The primer pair *sarA*-out-L/R used is listed in Table S4. (B) DNA sequencing showing deletion of *sle1* gene in the RN4220 $\Delta$ *sarA* strain. (C) The full-length blot for the Western blot in Fig. 4B. The red box represents the depicted part of the blot.

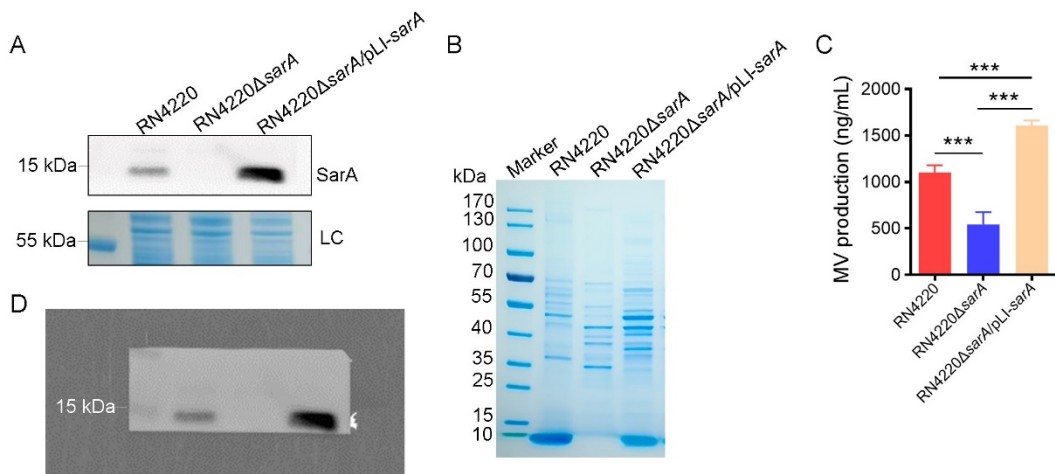

**Fig. S5** The effect of SarA on *S. aureus* MV production. (A) Western blot detection of SarA expression in RN4220 and its derivatives. LC, Loading control. (B) SDS-PAGE analysis of proteins in the MVs derived from the indicated strains. (C) BCA detection of total MV proteins from *S. aureus* RN4220 and its derivatives. (D) The full-length blot for the Western blot in Fig. S5A.

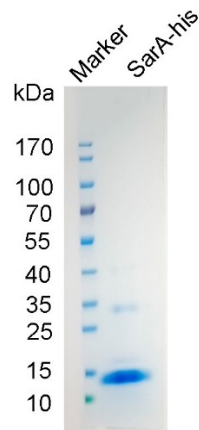

**Fig. S6** SDS-PAGE analysis of the purified SarA protein.

## Supplementary Tables

**Table S1. The MIC<sub>c</sub> of OXA against diverse *S. aureus* strains (mg/L)**

|         | <b>RN4220</b>      | <b>RN4220<math>\Delta</math>slc1</b> | <b>RN4220<math>\Delta</math>sarA</b> | <b>N315</b>    | <b>USA300</b>  | <b>Newman</b>     |
|---------|--------------------|--------------------------------------|--------------------------------------|----------------|----------------|-------------------|
| MIC     | 0.5                | 0.25                                 | 0.25                                 | >64            | 32             | 1.0               |
| 1/8 MIC | 0.062 <sup>a</sup> | 0.031 <sup>a</sup>                   | 0.031 <sup>a</sup>                   | 2 <sup>b</sup> | 2 <sup>b</sup> | 0.25 <sup>b</sup> |

<sup>a</sup> The MIC value of *S. aureus* strains was detected three times. As for RN4220 and its derivatives, 1/4 MIC of OXA slightly suppressed *S. aureus* growth, therefore, 1/8 MIC was used in this study.

<sup>b</sup> The growth of high-virulent N315 was greatly inhibited by OXA at 8 mg/L<sup>[1]</sup>, therefore, 2 mg/L OXA was used to treat N315, USA300, and Newman in this study.

**Table S2 · Proteins identified in MVs and MVs/OXA by proteomic analysis**

| Protein.ID | Protein name                                              | Gene           | AA No. | MV 1      | MV2       | MV3       |
|------------|-----------------------------------------------------------|----------------|--------|-----------|-----------|-----------|
| P0C1S0     | HTH-type transcriptional regulator MgrA                   | mgrA           | 147    | 210561.03 | 2771.949  | 129706.91 |
| Q2F119     | Probable quinol oxidase subunit 3                         | qoxC           | 201    | 323221.75 | 2771.949  | 2771.949  |
| A0A0B4N9G0 | Membrane protein                                          | CV021_05915    | 431    | 79325.55  | 386162.4  | 375570.66 |
| A0A0D1HLP4 | Exported protein                                          | A6762_13085    | 63     | 154635.17 | 118419.94 | 2771.949  |
| A0A0E0VRM0 | DUF3139 domain-containing protein                         | ST398NM01_2438 | 121    | 242355.55 | 2771.949  | 199138.5  |
| A0A0H3K686 | Immunoglobulin G-binding protein A                        | spa            | 508    | 2689895   | 801526.1  | 781901.6  |
| A5IQ92     | Large ribosomal subunit protein uL1                       | rplA           | 230    | 217501.34 | 2771.949  | 2771.949  |
| A5IQ93     | Large ribosomal subunit protein uL10                      | rplJ           | 166    | 175935.36 | 2771.949  | 770331.94 |
| A5IQ96     | DNA-directed RNA polymerase subunit beta                  | rpoB           | 1183   | 60536.504 | 2771.949  | 2771.949  |
| A5IQ99     | Small ribosomal subunit protein uS12                      | rpsL           | 137    | 169636.55 | 117197.2  | 2771.949  |
| A5IQA0     | Small ribosomal subunit protein uS7                       | rpsG           | 156    | 58495.805 | 2771.949  | 2771.949  |
| A5IQA1     | Elongation factor G                                       | fusA           | 693    | 1471169   | 751329.9  | 152350.31 |
| A5IQA2     | Elongation factor Tu                                      | tuf            | 394    | 2226721.2 | 487076    | 896022.25 |
| A5IQX7     | Phosphoglycerate kinase                                   | pgk            | 396    | 85768.38  | 2771.949  | 2771.949  |
| A5IRD0     | Na <sup>(+)</sup> /H <sup>(+)</sup> antiporter subunit A1 | mhxA1          | 801    | 2771.949  | 224612.2  | 229682.05 |
| A5ISB7     | Acyl carrier protein                                      | acpP           | 77     | 491988.6  | 2771.949  | 181458.86 |
| A5ISD0     | Succinate--CoA ligase [ADP-forming] subunit beta          | sucC           | 388    | 42696.348 | 2771.949  | 2771.949  |
| A5ISE0     | Small ribosomal subunit protein uS2                       | rpsB           | 255    | 95939.04  | 2771.949  | 2771.949  |
| A5ISG9     | Protein RecA                                              | recA           | 347    | 55387.23  | 2771.949  | 2771.949  |
| A5ISX6     | Cell cycle protein GpsB                                   | gpsB           | 114    | 1294591.2 | 139436.86 | 186101.44 |
| A5ISY4     | Asparagine--tRNA ligase                                   | asnS           | 430    | 57160.1   | 2771.949  | 2771.949  |
| A5ITA1     | Flotillin-like protein FloA                               | floA           | 329    | 1864385.4 | 650841.44 | 975703.4  |
| A0A1D5AAV8 | Uncharacterized protein conserved in bacteria             | NCTC5664_03517 | 75     | 387069.4  | 2771.949  | 139128.14 |
| A5ITN4     | Acetate kinase                                            | ackA           | 400    | 49077.113 | 2771.949  | 2771.949  |
| A5ITP0     | Septation ring formation regulator EzrA                   | ezrA           | 564    | 149823.47 | 145719.81 | 2771.949  |
| A5IU10     | UPF0342 protein SaurJH9_1898                              | SaurJH9_1898   | 114    | 82869.055 | 79245.83  | 2771.949  |
| A5IUN6     | Membrane protein insertase YidC                           | yidC           | 290    | 889848.6  | 944311.94 | 1386828   |
| A5IUP8     | ATP synthase subunit beta                                 | atpD           | 470    | 2257931.5 | 539081.75 | 709441.8  |
| A5IUP9     | ATP synthase gamma chain                                  | atpG           | 288    | 253573.36 | 2771.949  | 2771.949  |
| A5IUQ0     | ATP synthase subunit alpha                                | atpA           | 502    | 973933.75 | 321758.44 | 253316.77 |
| A5IUQ2     | ATP synthase subunit b                                    | atpF           | 173    | 1246272.9 | 422936.1  | 483813.7  |
| A5IV17     | Small ribosomal subunit protein uS5                       | rpsE           | 166    | 120557.85 | 2771.949  | 2771.949  |
| A5IV20     | Small ribosomal subunit protein uS8                       | rpsH           | 132    | 116917.5  | 2771.949  | 2771.949  |
| A5IV29     | Large ribosomal subunit protein uL22                      | rplV           | 117    | 514062.12 | 236150.64 | 209172.9  |
| A5IV31     | Large ribosomal subunit protein uL2                       | rplB           | 277    | 136550.88 | 125790.84 | 281521.06 |
| A5IV35     | Small ribosomal subunit protein uS10                      | rpsJ           | 102    | 867721.2  | 2771.949  | 2771.949  |
| A6QDH3     | PTS system glucose-specific EIICBA component              | ptsG           | 681    | 184863.66 | 396083.38 | 994761.4  |
| A6QEZZ     | Undecaprenyl-diphosphatase                                | uppP           | 291    | 409953.12 | 2771.949  | 218151.53 |
| A6QF98     | Extracellular matrix protein-binding protein emp          | ssp            | 340    | 1296887.5 | 317071.44 | 320343.22 |
| A6QH29     | Elastin-binding protein EbpS                              | ebpS           | 486    | 220847.95 | 368464.34 | 125722.83 |
| Q2UX41     | Elastin binding protein (Fragment)                        | ebpS           | 349    | 179413.72 | 368464.34 | 125722.83 |

| Protein.ID | Protein name                                      | Gene           | AA No. | MV 1      | MV2       | MV3       |
|------------|---------------------------------------------------|----------------|--------|-----------|-----------|-----------|
| Q2YY76     | Elastin-binding protein EbpS                      | ebpS           | 483    | 220847.95 | 368464.34 | 125722.83 |
| A6QI23     | Foldase protein PrsA                              | prsA           | 320    | 13186686  | 5833952.5 | 11566480  |
| A0A380DWX1 | Foldase protein PrsA                              | prsA           | 320    | 13186686  | 5833952.5 | 11566480  |
| A6QI56     | Monofunctional glycosyltransferase                | mgt            | 269    | 956904.9  | 317106.3  | 697656.56 |
| A6QIQ7     | Immunoglobulin-binding protein Sbi                | sbi            | 436    | 377432192 | 72109296  | 216239472 |
| A0A6B0CTK3 | Immunoglobulin-binding protein Sbi (Fragment)     | sbi            | 124    | 53934492  | 16999258  | 39335416  |
| A6QK89     | L-lactate dehydrogenase 2                         | ldh2           | 319    | 724717.8  | 454867.1  | 1182825.8 |
| A6U1G3     | UPF0154 protein SaurJH1_1431                      | SaurJH1_1431   | 80     | 3325858.8 | 2771.949  | 2771.949  |
| A7WYS8     | Lysine--tRNA ligase                               | lysS           | 495    | 58981.72  | 2771.949  | 2771.949  |
| O08387     | Protein translocase subunit SecY                  | secY           | 430    | 53237.48  | 82110.1   | 117238.01 |
| O86488     | Serine-aspartate repeat-containing protein D      | sdrD           | 1315   | 215607.75 | 2771.949  | 126533.05 |
| P00644     | Thermonuclease                                    | nuc            | 231    | 1585925   | 218662.34 | 733757.75 |
| P0A029     | Cell division protein FtsZ                        | ftsZ           | 390    | 393687.25 | 2771.949  | 320552.06 |
| P0A036     | Glyceraldehyde-3-phosphate dehydrogenase I        | gapA1          | 336    | 4680806   | 1915411.8 | 1495548.1 |
| P0A039     | Glutamine synthetase                              | glnA           | 446    | 2411106   | 530508.4  | 900140.94 |
| P0A071     | Gamma-hemolysin component A                       | hlgA           | 309    | 606639    | 275113.56 | 372294.28 |
| Q9AFA9     | Leukocidin LukS component (Fragment)              |                | 286    | 125648.9  | 90321.38  | 2771.949  |
| P0A0A1     | Pyruvate dehydrogenase E1 component subunit beta  | pdhB           | 325    | 209699.66 | 2771.949  | 2771.949  |
| P0A0A4     | Aminoacyltransferase FemA                         | femA           | 420    | 2771.949  | 128986.03 | 117083.61 |
| P0A0E1     | Phosphocarrier protein HPr                        | ptsH           | 88     | 426668.94 | 2771.949  | 162404.11 |
| P0C1U7     | N-acetylmuramoyl-L-alanine amidase sle1           | sle1           | 334    | 626128.4  | 79615.81  | 117255    |
| P10335     | Lipase 2                                          | lip2           | 690    | 10124640  | 1897688.9 | 4263664   |
| Q2FUU5     | Lipase 1                                          | lipA           | 680    | 1349733.2 | 460466.12 | 1016998.7 |
| P11162     | PTS system lactose-specific EIICB component       | lacE           | 570    | 258667.78 | 935314.5  | 1522800.8 |
| P21224     | Uncharacterized leukocidin-like protein 1         | SACOL2004      | 338    | 8571573   | 2454146.8 | 2435279.5 |
| A0A0E0VRF0 | Leukocidin F subunit                              | ST398NM01_2060 | 338    | 7790441   | 560988.94 | 684619.3  |
| P60089     | Pyruvate dehydrogenase E1 component subunit alpha | pdhA           | 370    | 96694.99  | 2771.949  | 85239.44  |
| P60284     | DNA-directed RNA polymerase subunit beta'         | rpoC           | 1207   | 88405.164 | 2771.949  | 2771.949  |
| P63332     | Putative zinc metalloprotease SAV1262             | SAV1262        | 428    | 731727.5  | 123300.79 | 717165.7  |
| P63870     | Cysteine synthase                                 | cysK           | 310    | 612309.56 | 83126.15  | 178712.42 |
| P65424     | Probable malate:quinone oxidoreductase 2          | mqq2           | 498    | 236597.69 | 2771.949  | 2771.949  |
| P65825     | Staphopain A                                      | sspP           | 388    | 146675.58 | 117974.62 | 2771.949  |
| P66962     | Transketolase                                     | tkt            | 662    | 461657.2  | 2771.949  | 2771.949  |
| P67370     | DegV domain-containing protein SAV1425            | SAV1425        | 279    | 74601.77  | 2771.949  | 2771.949  |
| P67477     | Fructose-bisphosphate aldolase                    | fbA            | 286    | 279504.84 | 116226.99 | 174197.84 |
| Q2FDM1     | Immunodominant staphylococcal antigen B           | isaB           | 175    | 472406.62 | 2771.949  | 2771.949  |
| Q2FDN2     | Uncharacterized protein SAUSA300_2562             | SAUSA300_2562  | 33     | 22148910  | 11430167  | 29937074  |
| Q2FEC8     | Uncharacterized lipoprotein SAUSA300_2315         | SAUSA300_2315  | 209    | 69365.99  | 2771.949  | 2771.949  |
| Q2FEG1     | Lysostaphin resistance protein A                  | lyrA           | 419    | 352446.84 | 312388.16 | 304891.6  |
| Q2FEI5     | Putative formate dehydrogenase SAUSA300_2258      | SAUSA300_2258  | 984    | 113120.33 | 2771.949  | 2771.949  |
| Q2FEJ8     | HTH-type transcriptional regulator SarR           | sarR           | 115    | 56345.008 | 2771.949  | 2771.949  |
| Q2FFA2     | Uncharacterized leukocidin-like protein 2         | SAUSA300_1975  | 351    | 10835198  | 4286404   | 8958463   |
| Q2FFZ9     | UPF0478 protein SAUSA300_1685                     | SAUSA300_1685  | 163    | 717478.2  | 2771.949  | 2771.949  |

| Protein.ID | Protein name                                                                                         | Gene           | AA No. | MV 1       | MV2        | MV3       |
|------------|------------------------------------------------------------------------------------------------------|----------------|--------|------------|------------|-----------|
| Q2FG40     | Pyruvate kinase                                                                                      | pyk            | 585    | 717632.44  | 194321.23  | 268657.25 |
| Q2FH26     | Dihydrolypoyllysine-residue succinyltransferase<br>component of 2-oxoglutarate dehydrogenase complex | odhB           | 422    | 13629.768  | 2771.949   | 2771.949  |
| Q2FH48     | Phosphate-binding protein PstS                                                                       | pstS           | 327    | 134352.73  | 2771.949   | 2771.949  |
| Q2FHD8     | Aerobic glycerol-3-phosphate dehydrogenase                                                           | glpD           | 557    | 1240227.4  | 2771.949   | 2771.949  |
| Q2FHZ1     | Ribonuclease J 1                                                                                     | rnj1           | 565    | 113176.195 | 2771.949   | 2771.949  |
| Q2FI17     | Probable quinol oxidase subunit 2                                                                    | qoxA           | 366    | 12991127   | 1630484.2  | 2217011.8 |
| Q2FI18     | Probable quinol oxidase subunit 1                                                                    | qoxB           | 662    | 3217389.8  | 931735.06  | 3768048   |
| Q2FIN9     | Ribosome hibernation promotion factor                                                                | hpf            | 190    | 57050.37   | 2771.949   | 2771.949  |
| Q2FIS2     | Lipoteichoic acid synthase                                                                           | ltaS           | 646    | 5558898    | 2387369.8  | 3500406.2 |
| Q2FJE0     | Large ribosomal subunit protein bL25                                                                 | rpLY           | 217    | 66358.305  | 2771.949   | 2771.949  |
| Q2FK44     | Formate acetyltransferase                                                                            | pfIB           | 749    | 1237632.2  | 125425.72  | 168123.94 |
| Q2FZK7     | Bifunctional autolysin                                                                               | atl            | 1256   | 7570411    | 2731115.8  | 3754681   |
| Q2FZQ3     | Enoyl-[acyl-carrier-protein] reductase [NADPH] FabI                                                  | fabI           | 256    | 70184.875  | 2771.949   | 2771.949  |
| Q2FZW3     | Protein DltD                                                                                         | dltD           | 391    | 213119.81  | 367541.25  | 2771.949  |
| Q2G2J2     | Staphylococcal secretory antigen ssaA2                                                               | ssaA2          | 267    | 7793055    | 1836280    | 4355984   |
| Q5HFU7     | Small ribosomal subunit protein bS1                                                                  | rpsA           | 391    | 409899.06  | 75953.05   | 195942.69 |
| Q5HFZ9     | PTS system glucose-specific EIIA component                                                           | ctr            | 166    | 111171.86  | 2771.949   | 2771.949  |
| Q5HHC7     | NAD-specific glutamate dehydrogenase                                                                 | gluD           | 414    | 24530.002  | 2771.949   | 2771.949  |
| A0A068A2L4 | Mannitol-specific phosphotransferase enzyme IIA<br>component                                         | fruA_2         | 652    | 2129766.8  | 830649.1   | 1231176.9 |
| A0A6B1RN75 | Mannitol-specific phosphotransferase enzyme IIA<br>component                                         | GAY51_04280    | 656    | 2129766.8  | 830649.1   | 1231176.9 |
| A0A068DV34 | Putative iron(III) dicitrate transporter binding lipoprotein                                         | yfiY           | 330    | 1839987    | 188879.2   | 114425.92 |
| A0A090LUS6 | DUF1307 domain-containing protein                                                                    | yehR           | 151    | 1083219.8  | 201212.6   | 690994.8  |
| A0A0A0Q4N9 | Serine protease HtrA-like                                                                            | htrA1          | 424    | 795179.44  | 102073.78  | 247505.89 |
| A0A0B4N8P6 | Amino acid/peptide transporter                                                                       | yjdL           | 501    | 139256.31  | 121982.71  | 2771.949  |
| A0A0B4ND04 | L-lactate permease                                                                                   | lctP_1         | 532    | 401276.4   | 590611.75  | 860616.8  |
| A0A0E0VKK7 | L-lactate permease                                                                                   | ST398NM01_0121 | 530    | 2771.949   | 120104.484 | 291243.44 |
| A0A0D1GQ07 | Exported protein                                                                                     | CV021_12380    | 168    | 2256514.8  | 67641.43   | 239548.9  |
| A0A0D1H4D9 | Putative transcription factor                                                                        | nhaX           | 137    | 2771.949   | 2771.949   | 2771.949  |
| A0A0D1HHU9 | Alanine:cation symporter family protein                                                              | CV021_04530    | 486    | 81405.72   | 2771.949   | 2771.949  |
| A0A0D1HK54 | Multifunctional fusion protein                                                                       | secD           | 759    | 1977080    | 1727036.5  | 1378956.6 |
| A0A0D1IBJ1 | Cell envelope transcriptional attenuator                                                             | lytR_1         | 315    | 53886.195  | 2771.949   | 2771.949  |
| A0A0D1IYN8 | Glucosamine-6-phosphate deaminase                                                                    | CV021_04655    | 199    | 79155.59   | 327039.2   | 2771.949  |
| A0A0D1JLA1 | ABC transporter permease                                                                             | yhaP           | 410    | 52085.65   | 2771.949   | 2771.949  |
| A0A0D1JNG6 | Pyruvate oxidase                                                                                     | G6Y24_16510    | 579    | 718897.3   | 2771.949   | 254070.58 |
| A0A0D1K0S1 | CamS family sex pheromone protein                                                                    | CV021_17180    | 399    | 58112.406  | 97800.89   | 116613.03 |
| A0A0D3Q462 | Uncharacterized protein                                                                              | DD547_00265    | 507    | 157650.88  | 77118.336  | 2771.949  |
| A0A0D3Q4X2 | Lipoprotein                                                                                          | metQ_2         | 280    | 341890.2   | 2771.949   | 206878.62 |
| A0A0D3Q6F6 | Fibrinogen-binding protein                                                                           | ecb            | 109    | 226279.1   | 100427.38  | 2771.949  |
| A0A0D3QA03 | DUF805 domain-containing protein                                                                     | yhal           | 215    | 119570.016 | 103960.836 | 108091.5  |
| A0A0D3QA12 | HlyD family efflux transporter periplasmic adaptor subunit                                           | emrK           | 215    | 138983.67  | 365567.8   | 234505.1  |

| Protein.ID  | Protein name                                            | Gene             | AA No. | MV 1      | MV2        | MV3       |
|-------------|---------------------------------------------------------|------------------|--------|-----------|------------|-----------|
| A0A0D6G8E8  | PTS ascorbate transporter subunit IIA                   | treB             | 475    | 2771.949  | 187188.12  | 2771.949  |
| A0A0D6GCD0  | Lipoprotein                                             | DD547_00359      | 190    | 196055.89 | 135236.86  | 2771.949  |
| A0A0D6H3T6  | Molybdate ABC transporter substrate-binding protein     | modA             | 260    | 373478    | 71124.06   | 407485.5  |
| A0A0D6H9G0  | Lytic regulatory protein                                | DD547_02182      | 363    | 622256.94 | 437164.16  | 458533.7  |
| A0A0D6HD63  | AAA family ATPase                                       | DD547_01922      | 978    | 137902.56 | 82069.586  | 2771.949  |
| A0A0D6HDR3  | Lipoprotein                                             | DD547_01873      | 208    | 48481.434 | 2771.949   | 2771.949  |
| A0A0E0VLB8  | NDxxF motif lipoprotein                                 | ST398NM01_0455   | 208    | 274641.44 | 2771.949   | 2771.949  |
| A0A0E0VLC3  | YhcL                                                    | ST398NM01_0461   | 465    | 1363575.4 | 1108774.2  | 842669.44 |
| A0A0E0VLN4  | ATP-dependent zinc metalloprotease FtsH                 | ftsH             | 697    | 130140.97 | 2771.949   | 250539.39 |
| A0A0E0VM22  | Manganese-binding protein                               | ST398NM01_0710   | 309    | 4999632   | 741573     | 751071.1  |
| A0A0E0VMK1  | Putative membrane spanning protein                      | ST398NM01_1007   | 361    | 84856.85  | 122347.88  | 2771.949  |
| A0A0E0VMW9  | DM13 domain-containing protein                          | ST398NM01_0785   | 146    | 838613.7  | 424131.88  | 793357    |
| A0A0E0VNI9  | Protein translocase subunit SecA                        | secA             | 843    | 353670.3  | 2771.949   | 2771.949  |
| A6QF62      | Protein translocase subunit SecA 1                      | secA1            | 843    | 353670.3  | 2771.949   | 2771.949  |
| A0A0E0VNI26 | Lipoprotein                                             | ST398NM01_1089   | 213    | 451576.3  | 115147.29  | 107970.18 |
| A0A0E0VNI36 | Spermidine/putrescine-binding protein                   | ST398NM01_1099   | 357    | 23386.076 | 2771.949   | 2771.949  |
| A0A0E0VNI55 | NupC/NupG family nucleoside CNT transporter             | ST398NM01_0596   | 404    | 77816.31  | 2771.949   | 159898.36 |
| A0A0E0VNI55 | DoxX family protein                                     | ST398NM01_0784   | 160    | 122670.92 | 2771.949   | 2771.949  |
| A0A0E0VNIU4 | IsdA                                                    | ST398NM01_1126   | 354    | 612512.9  | 69221.55   | 185644.95 |
| A5IS16      | Iron-regulated surface determinant protein A            | isdA             | 350    | 404942.25 | 69221.55   | 185644.95 |
| A0A0E0VNI1  | Glycine betaine transporter                             | ST398NM01_1350   | 548    | 300054.97 | 80544.54   | 245288.66 |
| A0A0E0VNI10 | Phosphoesterase                                         | ST398NM01_1910   | 398    | 64075.41  | 129384.766 | 178503.75 |
| A0A0E0VNIH8 | Lipoprotein                                             | ST398NM01_1596   | 193    | 291222.7  | 2771.949   | 131222.69 |
| A0A0E0VNI20 | Putative membrane associated protein                    | ST398NM01_1975   | 91     | 169333.34 | 2771.949   | 2771.949  |
| A0A0E0VNI70 | Transaldolase                                           | ST398NM01_1832   | 237    | 58218.098 | 2771.949   | 2771.949  |
| A0A0E0VNI35 | Ferrichrome-binding protein                             | ST398NM01_2335   | 302    | 7685489.5 | 797427     | 1443276.6 |
| A0A0E0VNI77 | Gluconate permease                                      | ST398NM01_2555   | 452    | 2771.949  | 714048.3   | 742108.06 |
| A0A0E0VNI28 | Putative membrane associated protein                    | ST398NM01_2217   | 310    | 51532.582 | 2771.949   | 2771.949  |
| A0A0E0VNI57 | Uncharacterized protein                                 | ST398NM01_2485   | 225    | 177512.25 | 104008.63  | 248404.4  |
| A0A0E1VNIQ1 | PTS system, N-acetylglucosamine-specific IIBC component | nagE             | 488    | 85834.52  | 338242.12  | 2771.949  |
| A0A0E1VNIJ9 | DUF4887 domain-containing protein                       | HMPREF0776_1781  | 209    | 15036.377 | 2771.949   | 2771.949  |
| A0A0E1VNIJ0 | Periplasmic binding protein                             | HMPREF0776_1746  | 342    | 438250.1  | 210986.55  | 2771.949  |
| A0A0E1XNI91 | Periplasmic binding protein                             | HMPREF0769_11558 | 342    | 438250.1  | 210986.55  | 2771.949  |
| A0A0E1VNI89 | Periplasmic binding protein                             | HMPREF0776_1614  | 283    | 323724.56 | 173996.45  | 248741.92 |
| A0A0E1VNI55 | DUF2179 domain-containing protein                       | HMPREF0776_1649  | 277    | 138788.88 | 112200.74  | 2771.949  |
| A0A0E1VNI00 | ABC transporter, substrate-binding protein, family 3    | HMPREF0776_0469  | 259    | 4080062.2 | 407805.94  | 862674.5  |
| A0A0E1VNI46 | ABC transporter, ATP-binding protein                    | HMPREF0776_0467  | 243    | 81757.055 | 2771.949   | 2771.949  |
| A0A0E1VNI84 | 5'-nucleotidase, lipoprotein e(P4) family               | HMPREF0776_1051  | 296    | 11928486  | 4137550.8  | 5040054   |
| P21222      | 30 kDa neutral phosphatase (Fragment)                   |                  | 35     | 6630391   | 1829448.8  | 2743547.2 |
| A0A0E1VNI89 | Periplasmic binding protein                             | HMPREF0776_0229  | 327    | 2418431.5 | 388316.6   | 571481.6  |
| A0A0E1VNI81 | RND transporter, HAE1/HME family, permease protein      | HMPREF0776_0309  | 1055   | 112166.27 | 2771.949   | 125596.57 |
| A0A0E1VNI29 | ABC transporter, ATP-binding protein                    | HMPREF0776_0571  | 231    | 7263150.5 | 649189.25  | 4992942   |



| Protein.ID | Protein name                                               | Gene             | AA No. | MV 1       | MV2       | MV3       |
|------------|------------------------------------------------------------|------------------|--------|------------|-----------|-----------|
| A0A0E1VQI3 | DUF4889 domain-containing protein                          | HMPREF0776_0437  | 118    | 233143.55  | 570749.4  | 516785.78 |
| A0A0E1VS93 | Alkaline shock protein 23                                  | HMPREF0776_2224  | 124    | 304593.7   | 117651.98 | 159563.56 |
| A0A0E1VT13 | Lipoprotein                                                | HMPREF0776_1830  | 273    | 886613.1   | 490077.75 | 352181.06 |
| A0A0E1VY92 | Alpha/beta hydrolase                                       | HMPREF0776_0241  | 294    | 40437.83   | 2771.949  | 2771.949  |
| A0A0E1X9N9 | DUF5067 domain-containing protein                          | HMPREF0769_11505 | 242    | 415787.06  | 400059.94 | 296047.7  |
| A0A0E1XH07 | Pyruvate carboxylase                                       | pyc              | 1150   | 188925.22  | 2771.949  | 2771.949  |
| A0A0E8I376 | Amidase domain-containing protein                          | EP54_05180       | 619    | 3801007.8  | 1510503.8 | 2254104.5 |
| A0A0H2WWQ9 | Penicillin-binding protein 2                               | pbp2             | 727    | 1944794.5  | 455989.12 | 862428.75 |
| A0A0H2WX78 | Lipoprotein, putative                                      | SACOL2407        | 199    | 56445.535  | 2771.949  | 103077.01 |
| A0A0H3JL84 | SA0233 protein                                             | SA0233           | 509    | 91619.3    | 117067.99 | 174380.77 |
| A0A0U1MQG8 | Putative exported protein                                  | BN1321_270014    | 302    | 945542.44  | 473883.75 | 309639.8  |
| A0A2C9TUB8 | non-specific serine/threonine protein kinase               | EP54_08500       | 664    | 724215.44  | 204816.05 | 361537.88 |
| A0A380DVS7 | SasB protein                                               | ebh_9            | 440    | 581914.2   | 136579.86 | 2771.949  |
| A0A7R6SNW6 | Pts system, glucose-specific iiabc component               | SAJPND4_02538    | 727    | 149462.45  | 2771.949  | 160081.05 |
| A0A850FQI7 | Tandem-type lipoprotein Lp110                              | lp110            | 260    | 171060.12  | 2771.949  | 102153.08 |
| A0A8D9SNT7 | L-lactate dehydrogenase                                    | ldh              | 317    | 119724.125 | 2771.949  | 2771.949  |
| A5IUP4     | 3-hydroxyacyl-[acyl-carrier-protein] dehydratase FabZ      | fabZ             | 146    | 629877.9   | 109503.35 | 95594.11  |
| A0A068A2A0 | Branched-chain amino acid transport system carrier protein | brnQ             | 451    | 91504.8    | 134176.2  | 2771.949  |
| A0A0D1JYJ4 | Membrane spanning protein                                  | CV021_05790      | 152    | 59419.336  | 2771.949  | 2771.949  |
| A0A0E0VKV9 | Putative membrane spanning protein                         | ST398NM01_0230   | 190    | 248640.58  | 191368.22 | 335950.7  |
| A0A0E0VN96 | Antibacterial protein 3                                    | ST398NM01_1170   | 47     | 738155.94  | 120353.05 | 130800.46 |
| A0A0H3JPX7 | DUF3173 domain-containing protein                          | SAV0393          | 66     | 2771.949   | 411145.9  | 405139.2  |
| A0A6M1XSY5 | Gfo/Iah/MocA family oxidoreductase (Fragment)              | G6Y24_10920      | 37     | 1466204    | 2422144.5 | 5022991.5 |

  

| Protein.ID | Protein name                                    | Gene          | Protein.<br>Length | MV/OXA1   | MV/OXA2   | MV/OXA3   |
|------------|-------------------------------------------------|---------------|--------------------|-----------|-----------|-----------|
| A5ITK3     | Large ribosomal subunit protein bL20            | rplT          | 118                | 917407.8  | 1338536.4 | 539593.9  |
| A5IUQ7     | Uracil phosphoribosyltransferase                | upp           | 209                | 81345.45  | 2771.949  | 202180.3  |
| A5IV27     | Large ribosomal subunit protein uL16            | rplP          | 144                | 168693.28 | 72650.234 | 73411.19  |
| A6QES8     | Transcriptional regulator SarA                  | sarA          | 124                | 1116424.9 | 1332845.8 | 1257635.9 |
| Q2FG28     | Putative universal stress protein SAUSA300_1656 | SAUSA300_1656 | 166                | 87790.71  | 131905.06 | 73590.1   |
| A0A0B4N9G0 | Membrane protein                                | CV021_05915   | 431                | 2771.949  | 134195.42 | 2771.949  |
| A5IQ92     | Large ribosomal subunit protein uL1             | rplA          | 230                | 235250.61 | 185141.19 | 283968.06 |
| A5IQ93     | Large ribosomal subunit protein uL10            | rplJ          | 166                | 2771.949  | 195704.75 | 204889.52 |
| A5IQ96     | DNA-directed RNA polymerase subunit beta        | rpoB          | 1183               | 2771.949  | 584847.9  | 1544407.4 |
| A5IQA0     | Small ribosomal subunit protein uS7             | rpsG          | 156                | 177749.69 | 114139.81 | 68208.05  |
| A5IQA1     | Elongation factor G                             | fusA          | 693                | 2771.949  | 102991.44 | 299251.3  |
| A5IQA2     | Elongation factor Tu                            | tuf           | 394                | 285598.94 | 140250.08 | 315599.53 |
| A5IQX2     | ATP-dependent Clp protease proteolytic subunit  | clpP          | 195                | 446366.16 | 470163.25 | 136447.2  |
| A5IQX7     | Phosphoglycerate kinase                         | pgk           | 396                | 2771.949  | 447226.9  | 213229.86 |
| A5ISD8     | ATP-dependent protease ATPase subunit HslU      | hslU          | 467                | 109824.21 | 121840.58 | 2771.949  |
| A5ISE0     | Small ribosomal subunit protein uS2             | rpsB          | 255                | 1472995.2 | 1109279.8 | 690524.5  |
| A5ISG9     | Protein RecA                                    | recA          | 347                | 203805.36 | 73373.36  | 55320.258 |
| A5ISX6     | Cell cycle protein GpsB                         | gpsB          | 114                | 2771.949  | 61773.906 | 55991.926 |

| Protein.ID | Protein name                                                      | Gene           | Protein. | MV /OXA1  | MV /OXA2   | MV /OXA3  |
|------------|-------------------------------------------------------------------|----------------|----------|-----------|------------|-----------|
|            |                                                                   |                | Length   |           |            |           |
| A5ISY4     | Asparagine--tRNA ligase                                           | asnS           | 430      | 220265.17 | 2771.949   | 427283.97 |
| A5ITA1     | Flotillin-like protein FloA                                       | floA           | 329      | 524252.28 | 494530.72  | 407197.75 |
| A0A1D5AAV8 | Uncharacterized protein conserved in bacteria                     | NCTC5664_03517 | 75       | 85790.586 | 111273.375 | 2771.949  |
| A5ITN4     | Acetate kinase                                                    | ackA           | 400      | 250196.73 | 30590.05   | 283423    |
| A5IUH6     | Chaperonin GroEL                                                  | groEL          | 538      | 2771.949  | 159821.25  | 82372.81  |
| A5IUJ2     | Redox-sensing transcriptional repressor Rex                       | rex            | 211      | 174581.11 | 111037.664 | 2771.949  |
| A5IUP8     | ATP synthase subunit beta                                         | atpD           | 470      | 2771.949  | 241127.31  | 2771.949  |
| A5IUP9     | ATP synthase gamma chain                                          | atpG           | 288      | 235454.72 | 68220.9    | 211303.19 |
| A5IUQ0     | ATP synthase subunit alpha                                        | atpA           | 502      | 2771.949  | 106355.516 | 2771.949  |
| A5IUQ8     | Serine hydroxymethyltransferase                                   | glyA           | 412      | 647881.75 | 629875.2   | 2771.949  |
| A5IV07     | Large ribosomal subunit protein bL17                              | rplQ           | 122      | 115708.77 | 71742.93   | 2771.949  |
| A5IV17     | Small ribosomal subunit protein uS5                               | rpsE           | 166      | 198939.81 | 238474.17  | 287500.12 |
| A5IV20     | Small ribosomal subunit protein uS8                               | rpsH           | 132      | 230077.94 | 125451.69  | 195234.9  |
| A5IV22     | Large ribosomal subunit protein uL5                               | rplE           | 179      | 116224.13 | 585508.44  | 332180.62 |
| A5IV31     | Large ribosomal subunit protein uL2                               | rplB           | 277      | 96327.945 | 2771.949   | 67104.86  |
| A5IV35     | Small ribosomal subunit protein uS10                              | rpsJ           | 102      | 2771.949  | 2771.949   | 93131.59  |
| A6QEZ2     | Undecaprenyl-diphosphatase                                        | uppP           | 291      | 2771.949  | 2771.949   | 207473.08 |
| A6QI23     | Foldase protein PrsA                                              | prsA           | 320      | 886166.4  | 944754.5   | 498347.28 |
| A0A380DWX1 | Foldase protein PrsA                                              | prsA           | 320      | 886166.4  | 944754.5   | 498347.28 |
| A6QI56     | Monofunctional glycosyltransferase                                | mgt            | 269      | 210432.33 | 216665.42  | 56099.965 |
| A6QIQ7     | Immunoglobulin-binding protein Sbi                                | sbi            | 436      | 958975.6  | 4604034.5  | 371823.75 |
| A6QK04     | Fructose-1,6-bisphosphatase class 3                               | fbp            | 654      | 161746.97 | 2771.949   | 62489.523 |
| A6QK89     | L-lactate dehydrogenase 2                                         | ldh2           | 319      | 293024.66 | 258402.47  | 201951.86 |
| A7WYS8     | Lysine--tRNA ligase                                               | lysS           | 495      | 113479.81 | 123012.17  | 2771.949  |
| O07325     | Cell division protein FtsA                                        | ftsA           | 470      | 2771.949  | 41205.773  | 2771.949  |
| P00644     | Thermonuclease                                                    | nuc            | 231      | 2771.949  | 999768.9   | 2771.949  |
| P0A036     | Glyceraldehyde-3-phosphate dehydrogenase 1                        | gapA1          | 336      | 974735.6  | 1762386    | 1671528.4 |
| P0A039     | Glutamine synthetase                                              | glnA           | 446      | 1034330.6 | 809896.5   | 454506.72 |
| P0A0A1     | Pyruvate dehydrogenase E1 component subunit beta                  | pdhB           | 325      | 2771.949  | 30773.717  | 2771.949  |
| P0A0A4     | Aminoacyltransferase FemA                                         | femA           | 420      | 2771.949  | 2771.949   | 206910.34 |
| P0A0E1     | Phosphocarrier protein HPr                                        | ptsH           | 88       | 163507.4  | 2771.949   | 2771.949  |
| P0C1U7     | N-acetylmuramoyl-L-alanine amidase sle1                           | sle1           | 334      | 9771.82   | 12770.923  | 2771.949  |
| P10335     | Lipase 2                                                          | lip2           | 690      | 393674.28 | 2771.949   | 2771.949  |
| Q2FUU5     | Lipase 1                                                          | lipA           | 680      | 92722.414 | 27026.188  | 2771.949  |
| P11162     | PTS system lactose-specific EIICB component                       | lacE           | 570      | 111993.96 | 2771.949   | 64697.64  |
| P60107     | TelA-like protein SAV1406                                         | SAV1406        | 378      | 101266.2  | 271785.72  | 2771.949  |
| P60284     | DNA-directed RNA polymerase subunit beta'                         | rpoC           | 1207     | 1497062.1 | 902172.1   | 1259174.9 |
| P63870     | Cysteine synthase                                                 | cysK           | 310      | 180190.5  | 167011.58  | 2771.949  |
| P64227     | Glutamine--fructose-6-phosphate aminotransferase<br>[isomerizing] | glmS           | 601      | 190744.75 | 2771.949   | 76389     |
| P65424     | Probable malate:quinone oxidoreductase 2                          | mqq2           | 498      | 2771.949  | 276897.6   | 275899.16 |
| P66962     | Transketolase                                                     | tkt            | 662      | 102796.41 | 2771.949   | 465961.1  |

| Protein.ID | Protein name                                                          | Gene           | Protein. | MV /OXA1   | MV /OXA2   | MV /OXA3  |
|------------|-----------------------------------------------------------------------|----------------|----------|------------|------------|-----------|
|            |                                                                       |                | Length   |            |            |           |
| Q2FDN2     | Uncharacterized protein SAUSA300_2562                                 | SAUSA300_2562  | 33       | 2675388.5  | 9663968    | 6686242   |
| Q2FEC8     | Uncharacterized lipoprotein SAUSA300_2315                             | SAUSA300_2315  | 209      | 286188     | 422943     | 268643.03 |
| Q2FEI9     | Putative 2-hydroxyacid dehydrogenase SAUSA300_2254                    | SAUSA300_2254  | 317      | 2771.949   | 195941.3   | 249327.19 |
| Q2FEJ8     | HTH-type transcriptional regulator SarR                               | sarR           | 115      | 645424.75  | 1386130.8  | 995671.2  |
| A0A2C9TQZ8 | MarR family transcriptional regulator (Fragment)                      | EP54_15150     | 52       | 2771.949   | 63339.543  | 76536.305 |
| Q2FG40     | Pyruvate kinase                                                       | pyk            | 585      | 259234.19  | 183730.22  | 164825.73 |
| Q2FHD8     | Aerobic glycerol-3-phosphate dehydrogenase                            | glpD           | 557      | 890234.75  | 2771.949   | 392626.47 |
| Q2FHZ1     | Ribonuclease J I                                                      | rnjI           | 565      | 263468.5   | 2771.949   | 303030.72 |
| Q2FI17     | Probable quinol oxidase subunit 2                                     | qoxA           | 366      | 247309.05  | 201739.47  | 218642.69 |
| Q2FID4     | Type II NADH:quinone oxidoreductase                                   | SAUSA300_0844  | 402      | 112884.89  | 2771.949   | 53194.09  |
| Q2FIN9     | Ribosome hibernation promotion factor                                 | hpf            | 190      | 2771.949   | 866404.94  | 585687.25 |
| Q2FJE0     | Large ribosomal subunit protein bL25                                  | rplY           | 217      | 2771.949   | 2771.949   | 338617.62 |
| P65176     | Ribitol-5-phosphate cytidyltransferase 2                              | tarI2          | 238      | 119235.5   | 239464.64  | 399221.6  |
| Q2FZQ3     | Enoyl-[acyl-carrier-protein] reductase [NADPH] FabI                   | fabI           | 256      | 2771.949   | 41704.68   | 118818.83 |
| Q2FZW3     | Protein DltD                                                          | dltD           | 391      | 2771.949   | 2771.949   | 66369.78  |
| Q5HFZ9     | PTS system glucose-specific EIIA component                            | err            | 166      | 2771.949   | 2771.949   | 48888.953 |
| Q5HH38     | 1,4-dihydroxy-2-naphthoyl-CoA synthase                                | menB           | 273      | 464883.94  | 423217.5   | 575152.2  |
| Q5HHB4     | Coenzyme A disulfide reductase                                        | cdr            | 438      | 100670.73  | 2771.949   | 340824.78 |
| Q5HHB9     | Signal peptidase IB                                                   | spsB           | 191      | 105210.586 | 285326.22  | 270565.28 |
| Q5HHC7     | NAD-specific glutamate dehydrogenase                                  | gluD           | 414      | 2771.949   | 204866.89  | 58135.57  |
| A0A068A2L4 | Mannitol-specific phosphotransferase enzyme IIA component             | fruA_2         | 652      | 208564.8   | 125965.82  | 191208.75 |
| A0A6B1RN75 | Mannitol-specific phosphotransferase enzyme IIA component             | GAY51_04280    | 656      | 208564.8   | 125965.82  | 191208.75 |
| A0A068DV34 | Putative iron(III) dicitrate transporter binding lipoprotein          | yfiY           | 330      | 518814.62  | 346472.38  | 483617.5  |
| A0A090LVU9 | Signal recognition particle protein                                   | ffh            | 455      | 303719.3   | 291351.16  | 2771.949  |
| A0A090LZA4 | 3-deoxy-7-phosphoheptulonate synthase                                 | aroX           | 363      | 92307.99   | 61572.87   | 50784.348 |
| A0A0A0Q4N9 | Serine protease HtrA-like                                             | htrA1          | 424      | 523959.22  | 401179.06  | 458556    |
| A0A0D11BJ1 | Cell envelope transcriptional attenuator                              | lytR_1         | 315      | 321451.25  | 232881.61  | 536717.06 |
| A0A0D1JNG6 | Pyruvate oxidase                                                      | G6Y24_16510    | 579      | 2771.949   | 2771.949   | 96720.58  |
| A0A0D1JPY7 | Zinc metalloproteinase                                                | CV021_08570    | 226      | 209402.67  | 2771.949   | 2771.949  |
| A0A0D3Q462 | Uncharacterized protein                                               | DD547_00265    | 507      | 86349.734  | 2771.949   | 2771.949  |
| A0A0D3Q4X2 | Lipoprotein                                                           | metQ_2         | 280      | 241252.5   | 143504.95  | 427874.3  |
| A0A0D3Q5Z8 | Dipeptide-binding protein DppE                                        | oppA           | 551      | 190709.72  | 71165.17   | 209561.8  |
| A0A0D3Q8S4 | Nicotinate phosphoribosyltransferase                                  | pncB           | 489      | 88657.75   | 71338.63   | 210002.84 |
| A0A0D6H3T6 | Molybdate ABC transporter substrate-binding protein                   | modA           | 260      | 741773.94  | 915160.5   | 383365.75 |
| A0A0D6HCB3 | Aminotransferase class I/II-fold pyridoxal phosphate-dependent enzyme | aspC           | 428      | 97059.24   | 130729.336 | 271773.5  |
| A0A0D6HDR3 | Lipoprotein                                                           | DD547_01873    | 208      | 21898.463  | 2771.949   | 2771.949  |
| A0A0D6HJM8 | 2-oxoisovalerate dehydrogenase subunit alpha                          | bfmBAA         | 330      | 31791.543  | 72003.68   | 2771.949  |
| A0A0E0VLB8 | NDxxF motif lipoprotein                                               | ST398NM01_0455 | 208      | 1304282.8  | 1019715.75 | 301193.34 |
| A0A0E0VLC3 | YhcL                                                                  | ST398NM01_0461 | 465      | 2771.949   | 2771.949   | 190076.48 |

| Protein.ID | Protein name                                            | Gene             | Protein. | MV /OXA1   | MV /OXA2   | MV /OXA3  |
|------------|---------------------------------------------------------|------------------|----------|------------|------------|-----------|
|            |                                                         |                  | Length   |            |            |           |
| A0A0E0VLN4 | ATP-dependent zinc metalloprotease FtsH                 | ftsH             | 697      | 2771.949   | 53961.98   | 2771.949  |
| A0A0E0VM22 | Manganese-binding protein                               | ST398NM01_0710   | 309      | 576781.75  | 785012.56  | 680332.1  |
| A0A0E0VMW9 | DM13 domain-containing protein                          | ST398NM01_0785   | 146      | 2429077.5  | 2776897.5  | 3136602   |
| A0A0E0VN19 | Protein translocase subunit SecA                        | secA             | 843      | 211941.03  | 2771.949   | 2771.949  |
| A6QF62     | Protein translocase subunit SecA 1                      | secA1            | 843      | 211941.03  | 2771.949   | 2771.949  |
| A0A0E0VN26 | Lipoprotein                                             | ST398NM01_1089   | 213      | 107091.63  | 462876.53  | 132450.61 |
| A0A0E0VNS5 | DoxX family protein                                     | ST398NM01_0784   | 160      | 2771.949   | 116244.24  | 259800.17 |
| A0A0E0VPM3 | DUF4064 domain-containing protein                       | ST398NM01_1100   | 339      | 2771.949   | 128748.08  | 201159.61 |
| A0A0E0VPM7 | YajC                                                    | ST398NM01_1701   | 86       | 556981.6   | 606894.06  | 721413.4  |
| A0A0E0VPP5 | Ribosome biogenesis GTPase A                            | ST398NM01_1243   | 294      | 2771.949   | 349062.44  | 261803.9  |
| A0A0E0VQH8 | Lipoprotein                                             | ST398NM01_1596   | 193      | 420976.6   | 834026.56  | 2771.949  |
| A0A0E0VQI1 | ABC transporter ATP-binding protein                     | ST398NM01_2052   | 290      | 189076.58  | 2771.949   | 2771.949  |
| A0A0E0VR20 | Putative membrane associated protein                    | ST398NM01_1975   | 91       | 2771.949   | 34182.3    | 2771.949  |
| A0A0E0VR70 | Transaldolase                                           | ST398NM01_1832   | 237      | 2771.949   | 2771.949   | 50585.95  |
| A0A0E0VRB3 | Cell shape-determining protein MreC                     | ST398NM01_1712   | 283      | 2771.949   | 54315.87   | 80447.555 |
| A0A0E0VRC5 | Ferrichrome-binding protein                             | ST398NM01_2335   | 302      | 1047788.7  | 1109945    | 1229818.9 |
| A0A0E0VTS7 | Uncharacterized protein                                 | ST398NM01_2485   | 225      | 308097.4   | 393748.97  | 272784.53 |
| A0A0E1VGQ1 | PTS system, N-acetylglucosamine-specific IIBC component | nagE             | 488      | 606184.4   | 2771.949   | 2771.949  |
| A0A0E1VJF0 | Periplasmic binding protein                             | HMPREF0776_1746  | 342      | 268452.3   | 184200.12  | 180072.72 |
| A0A0E1X971 | Periplasmic binding protein                             | HMPREF0769_11558 | 342      | 268452.3   | 184200.12  | 180072.72 |
| A0A0E1VLR9 | Periplasmic binding protein                             | HMPREF0776_1614  | 283      | 284267.4   | 210973.97  | 228153.73 |
| A0A0E1VN00 | ABC transporter, substrate-binding protein, family 3    | HMPREF0776_0469  | 259      | 844037.8   | 1298445.5  | 724163.8  |
| A0A0E1VN46 | ABC transporter, ATP-binding protein                    | HMPREF0776_0467  | 243      | 2771.949   | 68001.25   | 72500.31  |
| A0A0E1VNB4 | 5'-nucleotidase, lipoprotein e(P4) family               | HMPREF0776_1051  | 296      | 2771.949   | 73098.19   | 2771.949  |
| A0A0E1VNE9 | Periplasmic binding protein                             | HMPREF0776_0229  | 327      | 401927     | 361151.56  | 500169.5  |
| A0A0E1VT13 | Lipoprotein                                             | HMPREF0776_1830  | 273      | 445384.4   | 1020230.25 | 2771.949  |
| A0A0E1VY92 | Alpha/beta hydrolase                                    | HMPREF0776_0241  | 294      | 37843.03   | 2771.949   | 232333.89 |
| A0A0E1X9N9 | DUF5067 domain-containing protein                       | HMPREF0769_11505 | 242      | 115986.414 | 30709.531  | 85911.44  |
| A0A0E1XH07 | Pyruvate carboxylase                                    | pyc              | 1150     | 941845.9   | 398039     | 889696.1  |
| A0A0H2WWQ9 | Penicillin-binding protein 2                            | pbp2             | 727      | 414705.22  | 641399.9   | 292178.06 |
| A0A0U1MHA7 | Oligopeptide ABC transporter (ATP-binding protein)      | oppF             | 313      | 561704.94  | 317412.75  | 2771.949  |
| A0A380E2T5 | Formate--tetrahydrofolate ligase                        | fts              | 581      | 311925.28  | 106445.69  | 332243.88 |
| A0A6A9GV45 | Alanine--tRNA ligase                                    | alaS             | 876      | 237967.81  | 2771.949   | 303169.28 |
| A0A850FQI7 | Tandem-type lipoprotein Lp110                           | lp110            | 260      | 2771.949   | 187852.3   | 96470.7   |
| Q2G026     | Protein translocase subunit SecG                        | SAOUHSC_00801    | 91       | 224183.23  | 2771.949   | 2771.949  |
| A0A0D6HG31 | Calcium-binding protein                                 | yokF             | 204      | 21169.787  | 2771.949   | 2771.949  |
| A0A0D1HE14 | Exported protein                                        | A6762_09810      | 57       | 185535.33  | 2771.949   | 198583.8  |
| A0A0H3JPX7 | DUF3173 domain-containing protein                       | SAV0393          | 66       | 2771.949   | 2771.949   | 20613.973 |
| A0A0E0VUE2 | Choline transport protein                               | ST398NM01_2662   | 540      | 2771.949   | 34474.195  | 2771.949  |

Note: A true detection was indicated by a value greater than 2771.949 (base line), and a protein is shown with at least one detection in three biological repeats.

**Table S3.** Strains and plasmids used in this study.

| Strains/plasmids                              | Description                                                                        | Reference  |
|-----------------------------------------------|------------------------------------------------------------------------------------|------------|
| <b>Strains</b>                                |                                                                                    |            |
| <b>E. coli</b>                                |                                                                                    |            |
| DH5 $\alpha$                                  | Laboratory strain                                                                  | Tiagen     |
| <b>S. aureus</b>                              |                                                                                    |            |
| Newman                                        | A highly virulent strain                                                           | [2]        |
| USA300                                        | A high-virulent and multidrug-resistant strain                                     | [3]        |
| N315                                          | USA100                                                                             | [4]        |
| RN4220                                        | Restriction deficient cloning host                                                 | [4]        |
| RN4220 $\Delta$ <i>sarA</i>                   | deletion of <i>sarA</i> in RN4220                                                  | This study |
| RN4220 $\Delta$ <i>sle1</i>                   | deletion of <i>sle1</i> in RN4220                                                  | This study |
| RN4220 $\Delta$ <i>sarA</i> /pLI- <i>sarA</i> | <i>sarA</i> overexpressed with pLI50 in RN4220 $\Delta$ <i>sarA</i>                | This study |
| RN4220-pXR- <i>sle1</i>                       | <i>sle1</i> overexpressed with pXR in RN4220                                       | This study |
| RN4220-pOS1- <i>sle1</i>                      | <i>sle1</i> reporter strain with pOS1                                              | This study |
| <b>plasmids</b>                               |                                                                                    |            |
| pBT2                                          | Shuttle vector, temperature sensitive                                              | [2]        |
| pBT2- $\Delta$ <i>sarA</i>                    | pBT2 recombinant plasmid for mutation of the <i>sarA</i> gene                      | [1]        |
| pBT2- $\Delta$ <i>sle1</i>                    | pBT2 recombinant plasmid for mutation of the <i>sle1</i> gene                      | This study |
| pLI50                                         | Shuttle overexpressed vector                                                       | [1]        |
| pLI- <i>sarA</i>                              | pLI50 recombinant plasmid for overexpression of the <i>sarA</i> gene               | [1]        |
| pXR                                           | Xylose inducible expression vector, fused with pLI50, <i>xyIR</i> and <i>xyLAB</i> | [1]        |
| pXR- <i>sle1</i>                              | pXR with <i>sle1</i> fused to a 3 $\times$ FLAG tag                                | This study |
| pOS1                                          | Reporter vector, lacZ activity                                                     | [4]        |
| pOS1- <i>sle1</i>                             | pBT2 recombinant plasmid for mutation of the <i>sle1</i> gene                      | This study |

**Table S4.** Primers used in this study.

| Primers             | Sequence (5'-3')                                          | Notes                             |
|---------------------|-----------------------------------------------------------|-----------------------------------|
| <i>sarA</i> -out-L  | TAGCAATGACATCCAGAAAAACT                                   | Selecting the <i>sarA</i>         |
| <i>sarA</i> -out-R  | TAGTTTATTGAGGGAGGTGTAC                                    | deletion                          |
| <i>sle1</i> -up-L   | CACTCATCGCAGTGCAGCGGGTATAAGAAGGCACATAAAG                  | PCR for homologous                |
| <i>sle1</i> -up-R   | ATATTTATATACGTAAGACTTTTAAAAATCCTCCTCTTGCT                 | upstream of <i>sle1</i>           |
| <i>sle1</i> -down-L | AGCAAGAGGAGGATTTTAAAAAGTCTTACGTATATAAATAT                 | PCR for homologous                |
| <i>sle1</i> -down-R | CCGGGTACCGAGCTCGAATTAGCGTATATCCGTAATTTCA                  | downstream of <i>sle1</i>         |
| <i>sle1</i> -in-L   | AGGTGGCGGATCATACTACACAGTA                                 |                                   |
| <i>sle1</i> -in-R   | TGACAATGAGTCACCTGCTGTACT                                  | Selecting the <i>sle1</i>         |
| <i>sle1</i> -out-L  | GATGTGGAGATTAAGCACTTICCG                                  | deletion                          |
| <i>sle1</i> -out-R  | AAACTTTGACAGCAGGCGCAATC                                   |                                   |
| <i>sle1</i> -qpcr-L | GAATGCTAATAACTGGGATA                                      | RT-qPCR                           |
| <i>sle1</i> -qpcr-R | GTTTGAGCGATAGAACCT                                        |                                   |
| <i>sarA</i> -qpcr-L | ACAGTTCTTTCATCATGCTCATTACG                                | RT-qPCR                           |
| <i>sarA</i> -qpcr-R | CGCTGTATTGACATACATCAGCG                                   |                                   |
| <i>atl</i> -qpcr-L  | ACGCCTACACCAACACCT                                        | RT-qPCR                           |
| <i>atl</i> -qpcr-R  | TTCCACCTAAACTTGCTTCT                                      |                                   |
| <i>gyrB</i> -qpcr-L | GGTGGCGACTTTGATCTAGC                                      | Internal reference gene,          |
| <i>gyrB</i> -qpcr-R | TTATACAACGGTGGCTGTGC                                      | RT-qPCR                           |
| <i>walR</i> -qpcr-L | ATGTGTACTGTGCATACGATGGTAATG                               | RT-qPCR                           |
| <i>walR</i> -qpcr-R | TGAATCTTTAGCAGTAAGCATTATAATTGG                            |                                   |
| <i>graR</i> -qpcr-L | AATGTTGCTGGTATTGAAGATTTCC                                 | RT-qPCR                           |
| <i>graR</i> -qpcr-R | AGATGATAAAAATAATATTGGTACGTTGG                             |                                   |
| <i>sle1</i> -P-L    | TAAAGACGATCCGGGATTATATTGCGTCCTACAAGC                      | PCR for <i>sle1</i> gene          |
| <i>sle1</i> -P-R    | CGTTGTAACGACAATTACTTTTTTTTGCACCTT                         | promoter region                   |
| <i>sle1</i> -EMSA-L | CATCAACCTATTATACATAATAAAATCGTATAATGATGTAGTATTCATAAATTCGGA | EMSA for <i>sle1</i> , comprising |
| <i>sle1</i> -EMSA-R | TCCGAATTTATGAATACTACATCATTATACGATTTTATTATGTATAATAGGTTGATG | the AT-rich fragment              |
| <i>sle1</i> -M-L    | CATCAACCTATTATACATAGGGGGGGCGTATAATGATGTAGTATTCGGGGGGCGGA  | Negative control for EMSA,        |
| <i>sle1</i> -M-R    | TCCGCCCCCGAATACTACATCATTATACGCCCCCTATGTATAATAGGTTGATG     | carried with the GC-rich fragment |
| <i>sle1</i> -flag-L | TGTAGGAGGAATATTATGCAAAAAAAGTAATTGCAGC                     | PCR for <i>sle1</i> gene to       |
| <i>sle1</i> -flag-R | CATGGTCTTTGTAGTCGTGAATATATCTATAATTATTTACTTGGTAAG          | recombine with pXR vector         |

## References

1. Shang W, Rao Y, Zheng Y, Yang Y, Hu Q, Hu Z, Yuan J, Peng H, Xiong K, Tan L, Li S, Zhu J, Li M, Hu X, Mao X, Rao X.  $\beta$ -Lactam Antibiotics Enhance the Pathogenicity of Methicillin-Resistant *Staphylococcus aureus* via SarA-Controlled Lipoprotein-Like Cluster Expression. *mBio*. 2019 Jun 11;10(3) pii: mBio.00880-19.
2. Chen J, Lv Y, Shang W, Yang Y, Wang Y, Hu Z, Huang X, Zhang R, Yuan J, Huang J, Rao X. Loaded delta-hemolysin shapes the properties of *Staphylococcus aureus* membrane vesicles. *Front Microbiol*. 2023;14:1254367.
3. Li M, Wang Y, Liu H, Huang X, Peng H, Yang Y, Hu Z, Dou J, Xiao C, Chen J, Shang W, Rao X. *Staphylococcus Aureus* Membrane Vesicles Kill Tumor Cells Through a Caspase-1-Dependent Pyroptosis Pathway. *Int J Nanomedicine*. 2024;19:4007-4019.
4. Peng H, Hu Q, Shang W, Yuan J, Zhang X, Liu H, Zheng Y, Hu Z, Yang Y, Tan L, Li S, Hu X, Li M, Rao X. 2017. WalK(S221P), a naturally occurring mutation, confers vancomycin resistance in VISA strain XN108. *J Antimicrob Chemother* 72:1006-13.
